# Supplementary material for: A Comparison of Tools Used for Tuberculosis Diagnosis in Resource-Limited Settings: A Case Study at Mubende Referral Hospital, Uganda
Source: PubMed Central journal article supplement (PMC4072677; doi:10.1371/journal.pone.0100720), 2014-06-26
Supplement: pone.0100720.s001.pdf [file pone.0100720.s001.pdf]

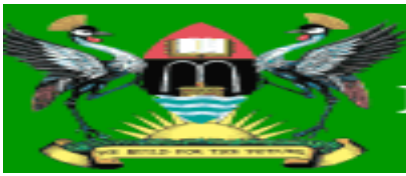

**Questionnaire**  
**For**  
**The epidemiology of tuberculous and non-tuberculous mycobacteria in**  
**Mubende district, Uganda**

**Author: Adrian Muwonge**

**Sero status.....**

**Case number.....**

**Date.....**

**Do you consent to participating in this study**

Yes.....   
NO.....

| <b>BIODATA</b>                                                                                                           |                                                                                                             |                                                                                                                                                                                                                                                                               |
|--------------------------------------------------------------------------------------------------------------------------|-------------------------------------------------------------------------------------------------------------|-------------------------------------------------------------------------------------------------------------------------------------------------------------------------------------------------------------------------------------------------------------------------------|
| Sex.....                                                                                                                 | Age.....                                                                                                    | Weight.....                                                                                                                                                                                                                                                                   |
| Height.....                                                                                                              | Tribe.....                                                                                                  | Occupation.....                                                                                                                                                                                                                                                               |
| Sub county.....                                                                                                          | Ward.....                                                                                                   |                                                                                                                                                                                                                                                                               |
| Family size.....                                                                                                         |                                                                                                             |                                                                                                                                                                                                                                                                               |
| <b>Risk Factors</b>                                                                                                      |                                                                                                             |                                                                                                                                                                                                                                                                               |
| Previous respiratory infection<br>Yes..... <input type="checkbox"/><br>NO..... <input type="checkbox"/>                  | Previous T.B infection<br>Yes..... <input type="checkbox"/><br>NO..... <input type="checkbox"/>             | Previous lymphadenitis<br>Yes..... <input type="checkbox"/><br>NO..... <input type="checkbox"/>                                                                                                                                                                               |
| Do you smoke<br>Yes..... <input type="checkbox"/><br>NO..... <input type="checkbox"/>                                    | Drink alcohol<br>Yes..... <input type="checkbox"/><br>NO..... <input type="checkbox"/>                      | Eat pork<br>Yes..... <input type="checkbox"/><br>NO..... <input type="checkbox"/>                                                                                                                                                                                             |
| Roasted meat<br>Yes..... <input type="checkbox"/><br>NO..... <input type="checkbox"/>                                    | Raw milk<br>Yes..... <input type="checkbox"/><br>NO..... <input type="checkbox"/>                           | Use pig manure<br>Yes..... <input type="checkbox"/><br>NO..... <input type="checkbox"/>                                                                                                                                                                                       |
| Do you rear pigs<br>Yes..... <input type="checkbox"/><br>NO..... <input type="checkbox"/>                                | If yes,<br>Subsistence..... <input type="checkbox"/><br>commercial..... <input type="checkbox"/>            | What is your water source<br>.....<br>.....<br>.....                                                                                                                                                                                                                          |
| Do you boil your drinking water<br>Yes..... <input type="checkbox"/><br>NO..... <input type="checkbox"/>                 | Have you ever taken unboiled water<br>Yes..... <input type="checkbox"/><br>NO..... <input type="checkbox"/> | If no<br>Is there any other mode of water treatment used?<br>.....                                                                                                                                                                                                            |
| Do you grow your own food or buy it from market<br>Yes..... <input type="checkbox"/><br>NO..... <input type="checkbox"/> | How often do you buy food stuffs from the Market<br>.....<br>.....                                          | Do you keep livestock<br>Yes..... <input type="checkbox"/><br>NO..... <input type="checkbox"/><br>If yes which<br>Cattle..... <input type="checkbox"/><br>Pigs..... <input type="checkbox"/><br>Shoats..... <input type="checkbox"/><br>Poultry..... <input type="checkbox"/> |
| <b>Therapeutics (Medical record)</b>                                                                                     |                                                                                                             |                                                                                                                                                                                                                                                                               |
| What TB medication previously used<br>.....<br>.....<br>.....                                                            | Currently used<br>.....<br>.....<br>.....                                                                   | For how long<br>.....<br>.....<br>.....                                                                                                                                                                                                                                       |

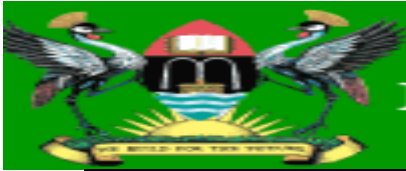

|                                                                                                                                                                       |  |  |
|-----------------------------------------------------------------------------------------------------------------------------------------------------------------------|--|--|
| last deworming<br>within last three months.... <input type="checkbox"/><br>within last one year..... <input type="checkbox"/><br>Never ..... <input type="checkbox"/> |  |  |
|-----------------------------------------------------------------------------------------------------------------------------------------------------------------------|--|--|

| <b>Social Networks/contacts</b>                                                                                                                    |                                                                                                                                                                                                                                                         |                                                                                                                                                                                                   |
|----------------------------------------------------------------------------------------------------------------------------------------------------|---------------------------------------------------------------------------------------------------------------------------------------------------------------------------------------------------------------------------------------------------------|---------------------------------------------------------------------------------------------------------------------------------------------------------------------------------------------------|
| <b>Marital status</b><br>Single..... <input type="checkbox"/><br>Married..... <input type="checkbox"/><br>Widowed..... <input type="checkbox"/>    | <b>How often do you come to Hospital in a year</b><br>.....<br>.....                                                                                                                                                                                    | <b>Do you go to places of worship</b><br>Yes..... <input type="checkbox"/><br>NO..... <input type="checkbox"/>                                                                                    |
| <b>IF yes which one and how often?</b><br>.....<br>.....                                                                                           | <b>Have you been to school/s ( parents day, visiting day etc) in the last 8 months.</b><br>Yes..... <input type="checkbox"/><br>NO..... <input type="checkbox"/>                                                                                        | <b>Have you been to any social gathering in the last 8 months ( wedding, last funeral rights, soccer game, bar.) etc</b><br>Yes..... <input type="checkbox"/><br>NO..... <input type="checkbox"/> |
| <b>Have you travelled away from your sub-county in the last 8 months?</b><br>Yes..... <input type="checkbox"/><br>NO..... <input type="checkbox"/> | <b>If yes which places</b><br>Mubende TC..... <input type="checkbox"/><br>Mityana..... <input type="checkbox"/><br>Myanzi..... <input type="checkbox"/><br>Kagadi..... <input type="checkbox"/><br>Kampala..... <input type="checkbox"/><br>Others..... |                                                                                                                                                                                                   |

| <b>Economic Aspects</b>                                                                                                                                                                                      |                                                                                                                                                                                                                                                                          |                                                                                                                                                                                                                      |
|--------------------------------------------------------------------------------------------------------------------------------------------------------------------------------------------------------------|--------------------------------------------------------------------------------------------------------------------------------------------------------------------------------------------------------------------------------------------------------------------------|----------------------------------------------------------------------------------------------------------------------------------------------------------------------------------------------------------------------|
| <b>How much on average do you earn per months.....</b>                                                                                                                                                       | <b>What do you spend on most.</b><br>Education..... <input type="checkbox"/><br>Domestic expenses..... <input type="checkbox"/><br>Health related..... <input type="checkbox"/><br>Leisure related..... <input type="checkbox"/><br>Others..... <input type="checkbox"/> | <b>If health. What do u spend on most?</b><br>Drugs..... <input type="checkbox"/><br>Transport..... <input type="checkbox"/><br>Consultancy..... <input type="checkbox"/><br>Nutrition..... <input type="checkbox"/> |
| <b>If leisure, what do u spend on most</b><br>Alcohol..... <input type="checkbox"/><br>Disco..... <input type="checkbox"/><br>Travel..... <input type="checkbox"/><br>Gambling..... <input type="checkbox"/> | <b>What do u spend on least</b><br>Education..... <input type="checkbox"/><br>Domestic..... <input type="checkbox"/><br>Health related..... <input type="checkbox"/><br>Leisure..... <input type="checkbox"/><br>Others ..... <input type="checkbox"/>                   |                                                                                                                                                                                                                      |
